# Supplementary material
Source: publisher site journal article supplement (https://www.dovepress.com/get_supplementary_file.php?f=212727.docx)
Supplement: Supplementary file 1 [file get_supplementary_file.php]

**Supplementary materials**

Appendix 1 - Participant Information Sheet

**Maximising the acquisition of core communication skills at the start of medical training: Simulated patients or real patients?**

Student leads: Anam Malik, Hasan Mohiaddin

Academic lead: Dr GM Murtagh

**STUDENT INFORMATION SHEET**

**Invitation to participate**

You are being asked to take part in a research study.  Before you decide, it is important for you to understand why the research is being done and what it involves.  This information sheet is designed to help you decide whether you would like to participate in this study. Please take time to read the following information carefully. Please ask us if there is anything that is not clear or if you would like further information.  Take time to decide whether or not you wish to take part.

**Background**

Currently, the average first year Imperial medical student receives approximately 10 hours of clinical communication teaching. This teaching consists of a combination of lectures, interactive small group teaching sessions and simulated patient encounters. The acquisition of practical communication skills is the main focus of the sessions where students are exposed to authentic patients and simulated patient encounters.

**What is the purpose of the study?**

A central element of communication skills training at Imperial involves students interviewing simulated patients. Training with simulated patients offers a number of advantages allowing students to experiment and practice with different patient scenarios in a safe learning environment.  The purpose of this study is to evaluate this method of teaching and to assess whether communication with real patients on a regular basis may be better for the development of communication skills in first year medical students.

**Do I have to take part?**

No. It is up to you to decide; participation is voluntary. If you agree to take part in the study, you will be asked to sign a consent form to show that you have agreed to take part.  You will be given a copy of the signed consent form. You are free to withdraw from the study at any time without giving a reason.

**What happens next?**

Nothing. You continue with your studies, your communication skills teaching is not affected in anyway. At some point the recording of your simulated patient interview will be assessed independently by external assessors. The purpose of this is to evaluate the communication skills training you receive at Imperial. You may be invited to participate in a focus group later in your academic year.

**What will happen to the results of the research study?**

The results of the study may be published in relevant academic journals. However, all data and personal information will be anonymised. You will be informed about the results of the study when it has finished and if you so wish can receive a copy of any publication produced.

**Contact for Further Information**

Should you wish any further information about the study please contact:

Academic lead

Dr GM Murtagh   g.murtagh@imperial.ac.uk

Or

Student Leads

Anam Malik, Hasan Mohiaddin

Thank you for taking the time to read this information sheet and for considering participation in this study.

**Appendix 2 Participant Consent Form**

**Maximising the acquisition of core communication skills at the start of medical training: Simulated patients or real patients?**

**PRINCIPAL INVESTIGATORS: ANAM MALIK, HASAN MOHIADDIN**

**ACADEMIC LEAD: DR GM MURTAGH**

**STUDENT CONSENT FORM (main study)**

**This form should be read in conjunction with the Information Leaflet**

**Please tick box**

**1. I confirm that I have read and understand the information sheet for the above study. I have had the opportunity to ask questions and have had these answered satisfactorily.**

**2. I understand that my participation is voluntary and that I am free to withdraw at any time after signing my consent form without giving any reason.**

**3. I understand that all personal information will be removed and all data collected will be anonymised for the purposes of publication in academic journals.**

**4. I agree to take part in the above study.**

**_______________                 ________________                 _________________**

**Name of Student                 Date                                       Signature**

**_______________**

**Name of Person                 Date                                      Signature**

**Appendix 3 - Mark Scheme for simulated Interview Recordings**

**1.    Introduction**

**(0-2 – 2 marks in total)**

- ‘Hello Mr/Ms McBride’  (patient responds)
- The student gives their full name, explains their role (Hellos my name is? I am a Y1 medical student at Imperial College working with the consultant’)
- Seeks permission and states purpose—‘Would you mind if I talked to you for about 5 mins to find out what brought you to the clinic today’?
- Asks patient for permission to continue “is that okay, can I take a seat”?

**2.      Information gathering**

**(0-4 – 4 marks in total)**

- Look for effective use of basic open questions—‘

·         Can you tell me what brought you here today’

·         ‘What made you decide to come to see the doctor?’

- ‘Can you tell me more about…’
- Can you describe…’

**3. Explores patient’s perspective**

**(0-3 – 3 marks in total)**

Examine how well the student incorporates questions to elicit the patient’s

- Ideas
- Concerns
- Expectations

**4. Non-verbal skills**

**(0-4 – 4 marks in total)**

- Open body language
- Relevant and appropriate eye contact
- Effective use of silence
- Acknowledges and responds to verbal/non-verbal cues

**5. Process Techniques**

**(0-3 – 3 marks in total)**

- Effective use of transition statements (signposting)
- Effective use of interim summaries
- Use of any other process skill you note which shapes the interaction

**6. Closure**

**(0-4 – 4 marks in total)**

- Uses a brief end summary
- Checks for further information – e.g. “is there anything else you want to add?”
- Checks for further concerns – often new concerns arise during the interview or pre-existing
- concerns don’t get raised if they are not the primary concern
- Thanks the patient for their time

**Any other comments**

**Appendix 4 - Focus group questions**

1. Can you tell us about your experience volunteering with Connect?
2. What did you find are the pros and cons of volunteering in this way?
3. Do you think volunteering has improved your clinical communication skills?
4. If so, in what way?
5. Are there any other skills you have gained from speaking to patients formally? (following on from a participant mentioning social skills)
6. Would you recommend the volunteering scheme to other students?
7. If not, why not?
8. How can such a volunteering experience be improved to enhance your skills development?
